# Supplementary material for: Synthetic computed tomography data allows for accurate absorbed dose calculations in a magnetic resonance imaging only workflow for head and neck radiotherapy
Source: PubMed Central journal article supplement (PMC8058030; doi:10.1016/j.phro.2020.12.007), 2021-01-11
Supplement: mmc1.pdf [file mmc1.pdf]

## Appendix A Supplementary material

### CT scan protocol parameters

| <b>CT parameter</b>                | <b>Value</b>             |
|------------------------------------|--------------------------|
| Reconstruction matrix              | 512x512 mm <sup>2</sup>  |
| Reconstruction in-plane resolution | 0.90-1.2 mm <sup>2</sup> |
| Number of slices                   | 176-253                  |
| Slice thickness                    | 2.0 mm                   |
| Slice spacing                      | 0.0 mm                   |
| Peak kilo voltage output           | 120 kV                   |
| Exposure                           | 225 mAs                  |
| Exposure time per slice            | 0.75 s                   |

### MRI scan protocol parameters

| <b>MRI parameter</b>              | <b>Value</b>              |
|-----------------------------------|---------------------------|
| Sequence type                     | Spoiled GRE (VIBE)        |
| Acquisition type                  | 3D                        |
| Scan plane                        | Transversal               |
| Frequency FOV                     | 500 mm                    |
| Phase FOV                         | 500 mm                    |
| Acquisition matrix                | 448x381                   |
| Reconstruction matrix             | 448x448                   |
| Reconstructed in-plane resolution | 1.12x1.12 mm <sup>2</sup> |
| Number of slices                  | 198                       |
| Slice thickness                   | 2.0 mm                    |
| Slice spacing                     | 0.0 mm                    |
| Readout bandwidth                 | 795 Hz/pixel              |
| Number of echoes                  | 2                         |
| Echo time                         | 2.39 ms and 4.77 ms       |
| Repetition time                   | 8 ms                      |
| Number of averages                | 3                         |
| 3D geometry correction            | On                        |
| Total scan time                   | 9 min 57 s                |
